48 **Bivalent COVID-19 booster vaccines induce cross-reactive but not BA.5-specific antibodies in**  
49 **polyclonal serum**

50  
51  
52  
53  
54 Vaccination against the coronavirus disease 2019 (COVID-19) increased immunity in the population  
55 reducing viral transmission and protecting against severe disease. However, continuous emergence of  
56 severe acute respiratory syndrome coronavirus 2 (SARS-CoV-2) variants required the implementation of  
57 bivalent boosters including the wild-type (WT, D614G) and BA.5 spike. Improved effectiveness of bivalent  
58 vs monovalent booster against Omicron sub-variants was reported [1], however limited differences in the  
59 immune response are detected [2, 3].

60  
61 We investigated whether a bivalent COVID-19 booster vaccine comprised of WT + BA.5 spike induced  
62 detectable BA.5-specific antibody responses in serum. Samples (n=16) collected before [31 days +/- 63 (0  
63 – 260)] and after [16 +/- 8 days (6 – 31)] receiving the bivalent booster were tested for antibody binding  
64 and avidity to the receptor binding domain (RBD) of WT and BA.5. Neutralization of WT and BA.5 viruses  
65 was determined. Omicron-specific antibodies were measured by depletion of WT RBD reactive antibodies  
66 and assessment of depleted sera against BA.5 RBD.

67  
68 A significant increase in antibody binding to WT and BA.5 RBD and in neutralization of WT and BA.5 viruses  
69 were detected following bivalent booster. There were significant differences in binding of post-booster  
70 sera between WT and BA.5 RBDs, however differences in neutralization were not significant. Pre- and  
71 post- booster RBD antibody avidity was lower against BA.5 vs WT RBD, which prompted us to look for BA.5  
72 specific antibodies. WT RBD depleted sera lacked reactivity to WT RBD – as expected – and to BA.5 RBD,  
73 suggesting that a single exposure to BA.5 antigens by the administration of bivalent vaccine boosters does  
74 not elicit robust levels of BA.5 specific serum antibodies.

75  
76 Reduced sensitivity of antibody tests based on WT viral antigens was detected in naïve individuals after  
77 Omicron infection [4]. However, most of the population globally has been infected with ancestral strains  
78 and/or exposed to WT antigens through vaccination, hence our results are relevant for the current  
79 immune status of the population worldwide. Moreover, our data align with recent results indicating that  
80 a monovalent booster with BA.1 vaccine elicits robust spike-specific germinal center B cell responses but  
81 low levels of *de novo* B cells targeting variant-specific epitopes [5]. Whether further exposures to Omicron  
82 antigens will boost these responses to make them detectable in serum remains to be explored.  
83 Importantly, it is likely that cross-reactive antibodies towards Omicron-antigens contribute to protection.

84  
85 Juan Manuel Carreño, Ph.D.  
86 Viviana Simon, MD, Ph.D.  
87 Florian Krammer, Ph.D.

88  
89 Icahn School of Medicine at Mount Sinai, New York, USA  
90 Tel. 212-241-0391  
91 [Florian.krammer@mssm.edu](mailto:Florian.krammer@mssm.edu)  
92 [Viviana.simon@mssm.edu](mailto:Viviana.simon@mssm.edu)  
93 [Jm.carreno@mssm.edu](mailto:Jm.carreno@mssm.edu)

94  
95



120  
121  
122  
123  
124  
125  
126  
127  
128  
129  
130  
131  
132  
133  
134  
135  
136  
137  
138  
139  
140  
141  
142  
143  
144  
145  
146  
147  
148  
149  
150  
151  
152  
153  
154  
155  
156  
157  
158  
159  
160  
161  
162  
163  
164  
165  
166  
167

## Author list

Juan Manuel Carreño\*<sup>&</sup>  
Gagandeep Singh\*  
Anass Abbad  
Temima Yellin  
Komal Srivastava  
Charles Gleason  
PVI study group  
Harm van Bakel  
Viviana Simon<sup>&</sup>  
Florian Krammer<sup>&</sup>

\*Contributed equally

<sup>&</sup>Corresponding authors: Florian Krammer ([florian.krammer@mssm.edu](mailto:florian.krammer@mssm.edu)), Viviana Simon ([viviana.simon@mssm.edu](mailto:viviana.simon@mssm.edu)), Juan Manuel Carreño ([jm.carreno@mssm.edu](mailto:jm.carreno@mssm.edu))

## Supplementary material

### Methods

**Ethics statement.** Sera and data were obtained from two observational studies: the PARIS study (Protection Associated with Rapid Immunity to SARS-CoV-2, approved by the Program for the Protection of Human Subjects at the Icahn School of Medicine at Mount Sinai Institutional Review Board, IRB-20-03374/STUDY-20-00442) and the observational longitudinal clinical sample collection from patients with emerging viral infections research study (approved by the Program for the Protection of Human Subjects at the Icahn School of Medicine at Mount Sinai Institutional Review Board- IRB-17-00791/STUDY-16-01215). Participants from both studies provided informed consent prior to sample and data collection.

**Study cohort and serum samples.** Blood was collected from individuals before and after receiving a Pfizer (n=10) or Moderna (n=6) bivalent vaccine booster of wild type + BA.5 spike. Samples were collected 31 +/- 63 (0 – 260) days before and 16 +/- 8 (6 – 31) days after bivalent booster vaccination. No comorbidities were reported by the participants. Detailed demographic characteristics and vaccination information per individual and per group are indicated in **Supplementary Tables 1 and 2**.

**Cells and viruses.** African green monkey Vero.E6 cells expressing transmembrane protease serine 2 (TMPRSS2) were cultured at 37°C with 5% CO<sub>2</sub> in Dulbecco's modified Eagle medium (DMEM, Thermo Fisher Scientific) supplemented with 10% fetal bovine serum (FBS), 1× nonessential amino acids (NEAA), 1% penicillin-streptomycin, 3 µg/ml puromycin (InvivoGen) and 100 µg/ml Normocin (InvivoGen). The SARS-CoV-2 isolate USA-WA1/2020 was used as wild-type reference (BEI Resources, NR-52281) and USA/NY-MSHSPSP-PV58128/2022 provided by the Mount Sinai Pathogen Surveillance Program as representative viral isolate for Omicron BA.5.

**Recombinant proteins.** Recombinant soluble SARS-CoV-2 proteins were expressed using a mammalian cell protein expression system. SARS-CoV-2 spike, RBD, and NP gene sequences from the ancestral strain

168 Wuhan-1 were cloned into a mammalian expression vector pCAGGs. Proteins were produced in Expi293F  
169 cells (Thermo Fisher Scientific) using the ExpiFectamine 293 Transfection Kit (Thermo Fisher Scientific) for  
170 plasmid transfection. Spike and RBD cell culture supernatants were harvested at 3 days post-transfection,  
171 centrifuged at 4000 x g, and filtered. Proteins were purified using Ni<sup>2+</sup>-nitrilotriacetic acid (Ni-NTA) agarose  
172 (Qiagen).. Purified proteins were concentrated using Amicon Ultracell centrifugal units (EMD Millipore),  
173 and buffer was exchanged to phosphate buffered saline (PBS, pH 7.4). Protein integrity was assessed using  
174 sodium dodecyl sulphate (SDS) polyacrylamide gels (5–20% gradient; Bio-Rad). Proteins stocks were  
175 stored at -80°C until used.

176  
177 **Binding and avidity measurements.** Antibody binding and avidity levels were assessed using a research-  
178 grade enzyme-linked immunosorbent assay (ELISA). Recombinant receptor binding domain (RBD) from  
179 the original Wuhan-Hu-1 SARS-CoV-2 isolate (wild-type, WT) and Omicron (BA.5) SARS-CoV-2 were used.  
180 Sera was heat inactivated at 56°C for 1h. Ninety-six-well plates (Immulon 4 HBX; Thermo Scientific) were  
181 coated with 50 µl/well of recombinant antigen (2 µg/mL) in phosphate-buffered saline (PBS; pH 7.4, Gibco)  
182 and incubated overnight at 4°C. Plates were washed 3 times with 1X PBS supplemented with 0.1% Tween-  
183 20 (PBS-T; Fisher Scientific) and blocked with 200 µl/well of 3% non-fat milk PBS-T for 1h at room-  
184 temperature (RT). Serum dilutions starting at 1:100 followed by 2-fold dilutions were prepared in 1% non-  
185 fat milk PBS-T. Blocking solution was removed and dilutions were added to the plates for 2h at RT. Plates  
186 were washed 3 times with PBS-T. For avidity measurements, the same sample was incubated with  
187 identical sample dilutions in side-by-side columns; one column was treated with 100 µl/well of 8M Urea  
188 while the other was left untreated. Plates were incubated for 10 min, then washed as described above.  
189 50 µl/well of anti-human IgG (Fab-specific, Sigma-Aldrich, A0293) conjugated to horseradish peroxidase  
190 (HRP) prepared in 1% non-fat milk PBS-T at 1:3000 dilutions were added for 1h at RT. Plates were washed  
191 3 times and 100 µl/well of o-phenylenediamine dihydrochloride (Sigmafast OPD; Sigma-Aldrich) were  
192 added for 10min at RT. To stop the reaction, 50 µl/well of 3 M hydrochloric acid (Thermo Fisher) were  
193 added. Optical density (OD) at 490 nm was measured using a Synergy 4 (BioTek) plate reader. Blank wells  
194 without serum were used to assess background. Antibody levels expressed as area under the curve (AUC)  
195 were calculated by subtracting the background plus three times the standard deviation of the OD. Avidity  
196 index (AI) was calculated using the following formula: AI = (Urea-treated sample AUC/Non-treated sample  
197 AUC) \*100).

198  
199 **Antigen coupling to magnetic beads.** Carboxyl magnetic beads (RayBiotech, Peachtree Corners, GA) were  
200 coated with RBD from WT SARS-CoV-2 at a ratio of 35 µg of antigen per 100 µl of magnetic beads. Mock  
201 beads were prepared using PBS (pH 7.4, Gibco) only instead of antigen. Briefly, 1ml of magnetic beads  
202 was transferred to a 1.5ml microtube and washed twice with wash buffer consisting of PBS supplemented  
203 with 0.1% BSA and 0.05% Tween-20. Beads were resuspended in 1ml of wash buffer and 350 µg of purified  
204 N-terminal 6x his tagged WT RBD antigen were added. The mixture was incubated for 2 h at 4°C with  
205 constant shaking. Unbound antigen was removed by passage of beads through a magnetic stand. Coupled  
206 beads were quenched by the addition of 1ml (1x volume of beads) of 50 mM Tris, (pH 7.4) and incubation  
207 at RT with constant shaking. Quenching buffer was removed using the magnetic stand and conjugated  
208 beads were washed 4 times with wash buffer. After the final wash, beads were resuspended in 1ml of  
209 wash buffer (1x volume of beads) and stored at 4°C prior to use for antibody depletion.

210  
211 **Antibody depletion.** Depletion of antibodies binding to WT RBD was performed using antigen coupled  
212 magnetic beads. Sera were diluted in PBS at a 1:10 ratio and 20 µl of antigen coupled magnetic beads or  
213 mock beads were added to 100 ul of pre-diluted sera. The mixture was incubated for 2 hours at 4°C with  
214 constant shaking. A magnet stand was used to separate the antibody-antigen-bound beads from the 1x

215 depleted sera. 20  $\mu$ l of new antigen-coupled beads were added to the 1x depleted sera followed by the  
216 same incubation steps as the first round of depletion. 2x depleted sera was used for binding experiments.

217  
218 **Microneutralization assay.** Serum samples were screened for neutralizing antibodies against ancestral  
219 SARS-CoV-2 USA-WA1/2020 and BA.5. Briefly, 96-well plates were seeded with  $2 \times 10^4$  Vero.E6 TMPRSS2  
220 cells per well in complete Dulbecco's modified Eagle medium (cDMEM) 24 hours before infection. Sera  
221 were prediluted 1:10 in infection media consisting of minimal essential media (MEM; Gibco, cat. no.  
222 11430-030) supplemented with 2 mM L-glutamine (Gibco, cat. no. 25030081), 0.1% sodium bicarbonate  
223 (w/v) (HyClone, cat. no. SH30033.01), 10 mM 4-(2-hydroxyethyl)-1-piperazineethanesulfonic acid (HEPES;  
224 Gibco, cat. no. 15630080), 100 U ml<sup>-1</sup> penicillin, 100  $\mu$ g ml<sup>-1</sup> streptomycin (Gibco, cat. no. 15140122)  
225 and 0.2% bovine serum albumin (BSA) (MP Biomedicals, cat. no. 810063). On the second day, serum  
226 dilutions were incubated with 10,000 tissue culture infectious dose 50% (TCID<sub>50</sub>) of virus per ml for one  
227 hour at RT. 120  $\mu$ l of the virus-serum mix were transferred to every well of Vero.E6 TMPRSS2 plates,  
228 followed by incubation for 1h at 37°C. Remdesivir (Medkoo Bioscience inc., cat. no. 329511) was used as  
229 a control of virus inhibition at an initial concentration of 10  $\mu$ g/ml. Viral inoculum was removed and 100  
230  $\mu$ l/well of the respective serum dilutions plus 100  $\mu$ l/well of infection media supplemented with 2% fetal  
231 bovine serum (FBS; Gibco, Ref. 10082-147) were added. Infection was allowed to proceed for 48 hours at  
232 37 °C. For nucleoprotein (NP) antigen staining, cell monolayers were fixed with 200  $\mu$ l of 10%  
233 paraformaldehyde (PFA) overnight at 4 °C. Cells were washed with 1x PBS then permeabilized with 150  
234  $\mu$ l/well of PBS (pH 7.4) containing 0.1 percent Triton X-100 for 15 minutes at RT. Plates were blocked for  
235 1 hour at RT with 200  $\mu$ l/well PBS supplemented with 3% BSA. Blocking solution was removed and 100  
236  $\mu$ l/well of biotinylated monoclonal antibody (mAb) 1C7C7 (mouse anti-SARS NP monoclonal antibody  
237 produced at The Icahn School of Medicine at Mount Sinai (ISMMS)) was added at 1  $\mu$ g/ml in PBS  
238 supplemented with 1% BSA for 1 hour at RT. Cells were washed with 200  $\mu$ l/well of PBS twice and  
239 100  $\mu$ l/well of HRP-conjugated streptavidin (Thermo Fisher Scientific) diluted in PBS supplemented with  
240 1% BSA were added at a 1:2,000 dilution for 1 h at room temperature. Plates were washed twice with PBS  
241 and 100  $\mu$ l/well of Sigmafast OPD were added for 10 minutes at RT. To stop the reaction, 50  $\mu$ l/well of a  
242 3 M HCl solution (Thermo Fisher Scientific) were added. Optical density (OD, 490 nm) was measured in a  
243 Synergy H1 microplate reader (Biotek). For analysis and data representation Prism 9 (GraphPad) was used.  
244 Percentage of neutralization, after background subtraction, and compared to the "virus only" control, was  
245 calculated. Inhibitory dilution 50% (ID<sub>50</sub>) was calculated by a non-linear regression curve fit analysis with  
246 top and bottom constraints of 100% and 0%, respectively.

247  
248 **Statistics.** Differences between groups were assessed using a regular one-way analysis of variance  
249 (ANOVA) test with Tukey multiple-comparison. P values lower than 0.0332 were considered statistically  
250 significant with a 95% confidence interval. Statistical analyses were performed using Prism 9 (GraphPad,  
251 USA).

## 252 253 **Financial support**

254  
255 We thank all the participants of the Personalized Virology Initiative's longitudinal studies for their  
256 generous and continued support of research. This effort was supported by the Serological Sciences  
257 Network (SeroNet) in part with Federal funds from the National Cancer Institute, National Institutes of  
258 Health, under Contract No. 75N91019D00024, Task Order No. 75N91021F00001. The content of this  
259 publication does not necessarily reflect the views or policies of the Department of Health and Human  
260 Services, nor does mention of trade names, commercial products or organizations imply endorsement by  
261 the U.S. Government. This work was also partially funded by the Centers of Excellence for Influenza  
262 Research and Surveillance (CEIRS, contract # HHSN272201400008C), the Centers of Excellence for



263 Influenza Research and Response (CEIRR, contract # 75N93021C00014), by the Collaborative Influenza  
264 Vaccine Innovation Centers (CIVICs contract # 75N93019C00051) and by institutional funds.

265  
266 PVI Study Group: Miriam Fried, Sara Morris, Leeba Sullivan, Hala Alshammary, Dalles Andre, Maria C  
267 Bermúdez-González, Gianna Cai, Christian Cognigni, Ana Gonzalez-reiche, Hyun Min Kang, Giulio Kleiner,  
268 Neko Lyttle, Jacob Mauldin, Brian Monahan, Jessica Nardulli, Annika Oostenink, Jose Polanco, Ashley  
269 Salimbangon, Morgan Van Kesteren.

270

271

## 272 **Conflict of interest statement**

273

274 The Icahn School of Medicine at Mount Sinai has filed patent applications relating to SARS-CoV-2  
275 serological assays and NDV-based SARS-CoV-2 vaccines which list Florian Krammer as co-inventor. Dr.  
276 Simon is listed on the SARS-CoV-2 serological assays patent. Mount Sinai has spun out a company, Kantaro,  
277 to market serological tests for SARS-CoV-2. Dr. Krammer has consulted for Merck and Pfizer (before 2020),  
278 and is currently consulting for Pfizer, Seqirus, 3<sup>rd</sup> Rock Ventures and Avimex and he is a co-founder and  
279 scientific advisory board member of CastleVax. The Krammer laboratory is also collaborating with Pfizer  
280 on animal models for SARS-CoV-2.

281

## 282 **Author contributions**

283

284 J.M.C. and F.K. conceptualized study; V.S., C.G., K.S., and the PVI study group enrolled participants,  
285 collected data, evaluated surveys, managed IRB approvals, and provided biospecimen and metadata, G.S.,  
286 T.Y., and J.M.C. performed experiments; H.v.B. performed sequencing of viral isolates; J.M.C., G.S., and  
287 A.A. analyzed data; J.M.C., V.S., and F.K. administered the project; F.K., V.S., and H.v.B. provided  
288 resources; J.M.C. and F.K. wrote original draft. All authors reviewed, edited and approved the final version  
289 of the manuscript, and have had access to the raw data. Members of the PVI study group collected,  
290 processed, stored biospecimen, curated metadata, conducted SARS-CoV-2 precision surveillance and  
291 assisted with serological antibody measurements.

292

293

294

295

296

297

298

299

300

301

302

303

304

305

306

307

308

309

310

311  
312  
313  
314

**Supplementary Table 1.** Detailed description of samples used and demographics per individual.

| Participant ID <sup>1</sup> | Age Bracket | Sex    | Ancestry                            | Time points included in this study | SARS CoV-2 infection prior to vaccination | Primary Vaccine type | Bivalent booster type |
|-----------------------------|-------------|--------|-------------------------------------|------------------------------------|-------------------------------------------|----------------------|-----------------------|
| BVB-1                       | 35-39       | Male   | Caucasian<br>Not Hispanic or Latino | Pre-Boost,<br>Post Boost           | No                                        | Pfizer               | Moderna               |
| BVB-2                       | 55-59       | Male   | Caucasian<br>Hispanic or Latino     | Pre-Boost,<br>Post Boost           | Yes                                       | Moderna              | Pfizer                |
| BVB-4                       | 45-49       | Male   | Caucasian<br>Not Hispanic or Latino | Pre-Boost,<br>Post Boost           | Yes                                       | Pfizer               | Pfizer                |
| BVB-5                       | 40-44       | Female | Other<br>Not Hispanic or Latino     | Pre-Boost,<br>Post Boost           | Yes                                       | Pfizer               | Moderna               |
| BVB-6                       | 45-49       | Male   | Other<br>Not Hispanic or Latino     | Pre-Boost,<br>Post Boost           | Yes                                       | Pfizer               | Moderna               |
| BVB-7                       | 35-39       | Female | Caucasian<br>Not Hispanic or Latino | Pre-Boost,<br>Post Boost           | Yes                                       | Pfizer               | Pfizer                |
| BVB-8                       | 40-44       | Female | Caucasian<br>Not Hispanic or Latino | Pre-Boost,<br>Post Boost           | Yes                                       | Pfizer               | Pfizer                |
| BVB-9                       | 65-69       | Male   | Caucasian<br>Not Hispanic or Latino | Pre-Boost,<br>Post Boost           | Yes                                       | Pfizer               | Pfizer                |
| BVB-10                      | 40-44       | Female | Caucasian<br>Not Hispanic or Latino | Pre-Boost,<br>Post Boost           | No                                        | Pfizer               | Moderna               |
| BVB-11                      | 30-34       | Female | Caucasian<br>Not Hispanic or Latino | Pre-Boost,<br>Post Boost           | Yes                                       | Pfizer               | Pfizer                |
| BVB-12                      | 60-64       | Female | Caucasian<br>Not Hispanic or Latino | Pre-Boost,<br>Post Boost           | Yes                                       | Pfizer               | Pfizer                |
| BVB-13                      | 40-44       | Female | Caucasian<br>Not Hispanic or Latino | Pre-Boost,<br>Post Boost           | No                                        | Pfizer               | Pfizer                |
| BVB-14                      | 70-79       | Female | Caucasian<br>Not Hispanic or Latino | Pre-Boost,<br>Post Boost           | No                                        | Pfizer               | Moderna               |
| BVB-15                      | 40-44       | Female | Caucasian<br>Not Hispanic or Latino | Pre-Boost,<br>Post Boost           | Yes                                       | Pfizer               | Moderna               |
| BVB-16                      | 45-49       | Female | Caucasian<br>Not Hispanic or Latino | Pre-Boost,<br>Post Boost           | No                                        | Pfizer               | Pfizer                |
| BVB-17                      | 70-79       | Male   | Caucasian<br>Hispanic or Latino     | Pre-Boost,<br>Post Boost           | Yes                                       | Pfizer               | Pfizer                |

315 Summary of the demographic, infection and vaccination histories of participants from whom serum  
316 samples were analyzed. The following abbreviations are used in the table, Pre-Boost: serum collected  
317 before the bivalent vaccine booster, Post Boost: serum collected after the bivalent vaccine booster.

318 <sup>1</sup>This is a code (bivalent booster/BVB abbreviation plus random number), not a patient ID.

319  
320  
321  
322  
323  
324



325  
326  
327  
328

**Supplementary Table 2.** Age and sex characteristics of individuals per group.

|         |                                                           |                     |
|---------|-----------------------------------------------------------|---------------------|
| Overall | Number of participants                                    | 16                  |
|         | Average age (min – max)                                   | 48 (32 – 73)        |
|         | Average days before bivalent booster +/- stdv (min – max) | 31 +/- 63 (0 – 260) |
|         | Average days after bivalent booster +/- stdv (min – max)  | 16 +/- 8 (6 – 31)   |
| Male    | Number of participants                                    | 6                   |
|         | Average age (min – max)                                   | 53 (37 – 73)        |
|         | Average days before bivalent booster +/- stdv (min – max) | 13 +/- 17 (0 – 38)  |
|         | Average days after bivalent booster +/- stdv (min – max)  | 17 +/- 8 (10 – 28)  |
| Female  | Number of participants                                    | 10                  |
|         | Average age (min – max)                                   | 45 (32 – 73)        |
|         | Average days before bivalent booster +/- stdv (min – max) | 41 +/- 78 (2 – 260) |
|         | Average days after bivalent booster +/- stdv (min – max)  | 15 +/- 9 (6 – 31)   |

329 The following abbreviations are used in the table: standard deviation (stdv), minimum (min), maximum  
330 (max).

331  
332  
333  
334

## References

335  
336  
337  
338  
339  
340  
341  
342  
343  
344  
345  
346  
347

1. Lin, D.Y., et al., *Effectiveness of Bivalent Boosters against Severe Omicron Infection*. N Engl J Med, 2023. **388**(8): p. 764-766.
2. Kurhade, C., et al., *Low neutralization of SARS-CoV-2 Omicron BA.2.75.2, BQ.1.1 and XBB.1 by parental mRNA vaccine or a BA.5 bivalent booster*. Nat Med, 2023. **29**(2): p. 344-347.
3. Wang, Q., et al., *Antibody Response to Omicron BA.4-BA.5 Bivalent Booster*. N Engl J Med, 2023. **388**(6): p. 567-569.
4. Rossler, A., et al., *Reduced sensitivity of antibody tests after omicron infection*. Lancet Microbe, 2023. **4**(1): p. e10-e11.
5. Alsoussi, W.B., et al., *SARS-CoV-2 Omicron boosting induces de novo B cell response in humans*. Nature, 2023.
